# Supplementary material for: Y-Site Physical Compatibility of Numeta G13E with Drugs Frequently Used at Neonatal Intensive Care
Source: PubMed Central journal article supplement (PMC7408039; doi:10.3390/pharmaceutics12070677), 2020-07-18
Supplement: pharmaceutics-12-00677-s001.pdf [file pharmaceutics-12-00677-s001.pdf]

# Supplementary Materials: Y-site Physical Compatibility of Numeta G13E with Drugs Frequently Used at Neonatal Intensive Care

Katerina Nezvalova-Henriksen, Niklas Nilsson, Camilla Tomine Østerberg, Vigdis Staven Berge and Ingunn Tho

**Table S1.** Composition of Numeta G13E per activated three-in-one 300 ml bag (SmPC, Baxter).

| <b>Amino Acids</b>             | <b>Amount<br/>(g/ 300 mL)</b> |
|--------------------------------|-------------------------------|
| Alanine                        | 0.75                          |
| Arginine                       | 0.78                          |
| Aspartic acid                  | 0.56                          |
| Cysteine                       | 0.18                          |
| Glutamic acid                  | 0.93                          |
| Glycine                        | 0.37                          |
| Histidine                      | 0.35                          |
| Isoleucine                     | 0.62                          |
| Leucine                        | 0.93                          |
| Lysine                         | 1.03                          |
| Methionine                     | 0.22                          |
| Ornithine                      | 0.23                          |
| Phenylalanine                  | 0.39                          |
| Proline                        | 0.28                          |
| Serine                         | 0.37                          |
| Taurine                        | 0.06                          |
| Threonine                      | 0.35                          |
| Tryptophan                     | 0.19                          |
| Tyrosine                       | 0.07                          |
| Valine                         | 0.71                          |
| Sodium glycerol phosphate      | 0.98                          |
| Potassium acetate              | 0.61                          |
| Magnesium acetate tetrahydrate | 0.10                          |
| Calcium chloride dihydrate     | 0.55                          |
| <b>Carbohydrates</b>           | <b>Amount<br/>(g/ 300 mL)</b> |
| Glucose monohydrate            | 44.00                         |
| <b>Lipids</b>                  | <b>Amount<br/>(g/ 300 mL)</b> |
| Olive oil (80%)                | 7.50                          |
| Soy bean oil (20%)             |                               |
| pH (ca.)                       | 5.5                           |
| Osmolarity ca. mOsm/L          | 1150                          |

**Table S2.** Composition of Peditrace (SmPC, Fresenius Kabi).

| <b>Peditrace (15 mL)</b> | <b>Amount<br/>(<math>\mu\text{g/ mL}</math>)</b> |
|--------------------------|--------------------------------------------------|
| Zinc                     | 250                                              |
| Copper                   | 20                                               |
| Manganese                | 1                                                |
| Selenium                 | 2                                                |
| Fluoride                 | 57                                               |
| Iodide                   | 1                                                |

**Table S3.** Composition of Soluvit (SmPC, Fresenius Kabi).

| <b>Solvit</b>               | <b>Amount<br/>(mg/ vial)</b> |
|-----------------------------|------------------------------|
| Thiamine mononitrate        | 3.1                          |
| Riboflavin sodium phosphate | 4.9                          |
| Nicotinamide                | 40                           |
| Pyridoxine hydrochloride    | 4.9                          |
| Sodium pantothenate         | 16.5                         |
| Sodium ascorbate            | 113                          |
| Biotin                      | 0.06                         |
| Folic acid                  | 0.4                          |
| Cyanocobalamine             | 0.005                        |

**Table S4.** Composition of Vitalipid Infant (SmPC, Fresenius Kabi).

| <b>Vitalipid Infant (10 mL)</b> | <b>Amount<br/>(<math>\mu\text{g/ mL}</math>)</b> |
|---------------------------------|--------------------------------------------------|
| $\alpha$ -Tocopherol            | 640                                              |
| Retinol                         | 69                                               |
| Phytomenadione                  | 20                                               |
| Ergocalciferol                  | 1                                                |
| Soya bean oil                   | 100                                              |
